# Supplementary material
Source: PubMed Central journal article supplement (PMC8906435)
Supplement: jvi.01813-21-s0005.pdf [file jvi.01813-21-s0005.pdf]

**Movie S1** (separate file). Typical dual color movie showing IAV (magenta) entry via the CME (CLCa, green) pathway. The movie was recorded at 1 fps and played at 30 fps. Scale bar: 2  $\mu\text{m}$ .

**Movie S2** (separate file). Typical dual color movie showing IAV (magenta) entry via the CME (CLCa, green) pathway. The movie was recorded at 1 fps and played at 30 fps. Scale bar: 2  $\mu\text{m}$ .

**Movie S3** (separate file). Typical tri-color movie showing the colocalization of IAV (magenta), CLCa (cyan), and OlyA (green). The movie was recorded at 0.5 fps and played at 20 fps. Scale bar: 2  $\mu\text{m}$ .

**Movie S4** (separate file). Typical tri-color movie showing the colocalization of IAV (magenta), CLCa (cyan), and FBP17 (green). The movie was recorded at 0.5 fps and played at 30 fps. Scale bar: 2  $\mu\text{m}$ .
